# Supplementary material for: Small RNA sequencing of extracellular vesicles identifies circulating miRNAs related to inflammation and oxidative stress in HIV patients
Source: BMC Immunol. 2020 Nov 11;21:57. doi: 10.1186/s12865-020-00386-5 (PMC7656686; doi:10.1186/s12865-020-00386-5)
Supplement: Supplementary file 3 — Additional file 3: Supplementary Table S2 - Read counts (normalized RPM) of all mapped mature plasma EV miRNAs in the test cohort. [file 12865_2020_386_MOESM3_ESM.xlsx]

## Sheet: Sheet1
Supplementary Table 2: Read counts (normalized RPM) of all mapped mature miRNAs in plasma EVs from the test cohort
	HIVn-1	HIVn-2	HIVn-3	HIVn-4	HIVn-5	HIVn-6	HIVn-7	HIVn-8	HIVp-1	HIVp-2	HIVp-3	HIVp-4	HIVp-5	HIVp-6	HIVp-7	HIVp-8	HIVp-9	HIVp-10	HIVp-11	HIVp-12	Sum counts
hsa-miR-26a-5p	132.405	114.329	7272.6	2124.67	9058.93	1709.96	1886.85	292.789	364.815	122.048	1162.77	1317.53	2850.79	5541.97	428.922	345.619	3606.9	451.194	895.139	808.222	40488.5
hsa-miR-21-5p	812.693	85.1119	1895.66	3672.17	3382.81	1255.73	4182.76	193.714	929.898	157.646	723.589	254.118	4049.29	3043.35	626.189	332.658	1179.36	1756.04	919.266	151.646	29603.7
hsa-miR-148a-3p	271.659	3.81098	4877.66	1812.03	4727.86	2091.79	792.329	26.6172	596.477	559.387	748.723	734.837	2116.37	5020.93	564.656	514.108	2284.42	567.53	1018.19	314.956	29644.3
hsa-let-7i-5p	249.972	99.0855	3914.44	1764.98	2817.89	362.071	2583.36	66.5429	462.243	1.69511	128.315	553.556	3012.99	1249.31	307.665	516.988	1685.79	1226.24	620.082	304.958	21928.2
hsa-miR-122-5p	457.33	74.9493	50.1559	1762.89	0	0	2786.05	0	486.059	22.884	62.1731	0	4218.57	0	713.06	1345.03	887.619	1311.14	784.151	0	14962.1
hsa-let-7f-5p	206.217	124.492	1648.3	1976.19	1237.45	0	1352.49	93.1601	399.456	1.69511	1.32283	129.487	2066.8	1184.18	314	158.409	1941.75	1075.32	458.427	0	14369.2
hsa-miR-1-3p	201.651	0	184.665	1327.92	0	0	1131.37	56.1918	124.492	45.7681	0	0	724.765	580.249	322.144	604.833	9324.82	275.118	1667.23	61.6581	16632.9
hsa-let-7a-5p	330.252	0	1103.43	1646.83	635.538	128.371	1278.78	0	258.726	2.54267	175.937	244.406	2100.92	550.644	327.121	614.193	2307.12	1064.31	942.188	1.66644	13713
hsa-let-7g-5p	63.5392	5.08131	1703.02	1492.08	2555.6	235.346	199.004	1.47873	376.722	0	67.4644	532.514	832.257	461.831	76.0114	1.44008	375.69	75.461	130.29	0	9184.83
hsa-miR-126-3p	62.3978	1.27033	270.158	410.923	6.72527	39.4987	453.286	0	145.06	0	0	237.932	576.079	94.7345	6.33429	406.102	5328.47	75.461	902.377	99.9862	9116.79
hsa-miR-99a-5p	0.380474	0	920.474	143.248	1755.29	287.188	514.092	1.47873	0	0	124.346	221.746	639.802	751.955	237.083	83.5245	2064.92	205.946	673.163	1.66644	8626.31
hsa-let-7c-5p	163.984	0	112.851	180.367	390.065	1.64578	377.738	0	191.068	46.6156	0.661416	168.333	442.841	8.88136	107.23	357.139	3531.9	209.09	325.724	0	6616.13
hsa-let-7b-5p	263.288	0	63.8348	432.881	13.4505	261.679	1015.29	68.0217	658.182	77.9752	3.9685	69.5991	1202.36	648.339	242.06	836.685	1560.56	499.929	60.3193	0	7978.42
hsa-miR-143-3p	179.584	0	486.74	106.652	410.241	55.9565	184.263	1.47873	0	0	179.905	0	394.566	0	107.683	224.652	1399.55	73.8889	381.218	0	4186.38
hsa-miR-10a-5p	42.6131	0	1.13991	694.282	0	0	965.536	0	369.145	0	0	59.8876	1608.84	0	131.21	108.006	348.167	393.026	723.832	1.66644	5447.35
hsa-miR-100-5p	270.517	2.54065	0.569953	542.669	0	84.7576	996.86	0	66.0347	0	138.897	53.4133	684.858	0	405.394	282.255	165.827	385.166	159.243	0	4239
hsa-miR-1246	7.60949	7.62196	0	143.248	33.6263	3.29156	99.5018	313.491	22.7333	11.8658	0	0	19.3099	71.0509	9.04898	20.1611	12.3854	47.1631	14.4766	6.66574	843.251
hsa-miR-92a-3p	319.598	0	575.653	480.978	141.231	148.943	681.771	1.47873	141.812	62.7192	0	76.0734	597.964	716.43	100.444	161.289	238.075	6.28842	125.464	0	4576.21
hsa-miR-30d-5p	0	196.901	617.829	755.972	410.241	0	14.741	54.7131	79.0251	1.69511	2.64566	17.8044	214.34	0	5.42939	8.64047	1034.87	147.778	12.0639	0	3574.69
hsa-miR-423-5p	94.3576	181.657	166.426	111.88	282.461	241.93	221.115	205.544	88.7679	340.718	0	152.147	112.641	888.136	19.0029	80.6443	295.873	297.128	0	86.6547	3867.08
hsa-miR-27a-3p	90.5529	0	577.933	162.592	40.3516	0	346.414	0	85.5203	0	1.98425	0	718.973	130.26	50.6743	61.9233	277.983	254.681	285.914	0	3085.75
hsa-miR-7-5p	225.241	0	329.433	271.857	40.3516	0	320.617	0	158.05	0	0	0	770.466	0	28.0518	190.09	250.46	3.14421	381.218	0	2968.98
hsa-miR-30c-5p	252.635	0	116.27	446.473	0	0	169.522	0	2.16507	0	0	0	279.994	296.045	1.8098	21.6012	1288.08	77.0331	270.23	0	3221.86
hsa-let-7d-5p	1.90237	0	2.27981	211.735	13.4505	0	103.187	0	96.887	0	1.32283	0	497.874	0	1.35735	149.048	1421.57	70.7447	449.982	0	3021.34
hsa-miR-222-3p	82.9434	0	156.167	386.874	0	0	718.624	0	156.968	0	1.32283	0	265.833	0	127.591	61.9233	0	95.8984	424.648	0	2478.79
hsa-miR-26b-5p	36.5255	2.54065	227.981	593.904	100.879	1.64578	110.558	2.95746	1.08254	0	0	137.58	116.503	5.92091	27.1469	83.5245	211.928	106.903	161.656	0	1929.24
hsa-miR-10b-5p	0	0	385.288	57.5083	329.538	55.9565	390.637	0	282.542	0	0	0	543.574	0	143.879	4.32023	255.965	125.768	132.702	0	2707.68
hsa-miR-22-3p	145.341	1.27033	0	196.574	262.285	46.0818	162.151	0	231.663	125.438	22.4881	0	453.139	0	5.42939	73.444	913.766	279.835	279.882	0	3198.79
hsa-miR-27b-3p	35.7646	0	157.307	76.852	6.72527	0	158.466	0	59.5395	0	53.5747	48.5575	249.742	224.995	150.213	57.6031	503.672	220.095	155.624	1.66644	2160.4
hsa-miR-155-5p	0	76.2196	779.696	178.798	383.34	47.7276	0	0	0	0	247.37	312.387	43.7691	153.944	0	57.6031	94.9546	25.1537	0	76.6561	2477.62
hsa-miR-378a-3p	35.7646	0	0	184.549	6.72527	0	92.1313	0	24.8983	0	63.4959	164.286	126.265	355.255	73.1459	0	930.968	29.87	156.83	0	2244.18
hsa-miR-191-5p	0	0	257.619	373.281	13.4505	82.2889	0	0	338.834	0	0	0	224.639	0	0.904898	1.44008	1.37615	121.052	219.562	0	1634.45
hsa-miR-24-3p	17.5018	0	63.8348	209.121	0	1.64578	51.5935	1.47873	43.3014	0	0	0	319.901	0	54.2939	177.13	579.361	176.076	48.2554	0	1743.49
hsa-miR-146a-5p	79.1387	0	56.9953	147.43	60.5274	0	206.374	0	23.8158	0	1.32283	0	100.412	290.125	0	0	2.75231	152.494	57.9065	0	1179.29
hsa-miR-125a-5p	0	0	47.8761	115.017	531.296	154.703	7.3705	0	110.419	0	0	0	63.0791	0	1.8098	0	571.104	154.066	110.988	0	1867.73
hsa-miR-150-5p	0	50.8131	1764.58	156.841	181.582	92.1636	0	0	0	0	1.32283	0	20.5972	0	0	0	4.12846	14.1489	0	0	2286.17
hsa-miR-192-5p	74.1925	0	0	269.243	0	0	18.4263	0	188.361	0	0	0	426.749	0	85.0604	149.768	105.964	293.198	291.945	0	1902.91
hsa-miR-203a-3p	0	0	0	106.652	0	0	154.781	0	0	0	0	0	462.151	0	104.063	47.5226	46.7892	100.615	0	0	1022.57
hsa-miR-25-3p	111.099	0	508.398	290.678	47.0769	0	106.872	0	41.1364	0	0	0	88.8256	5.92091	38.9106	0	136.239	124.196	0	0	1499.35
hsa-miR-30a-5p	0	0	1.13991	169.388	6.72527	0	339.043	0	6.49521	0	0	0	190.524	0	8.14408	1.44008	5.50461	67.6005	65.1449	0	861.15
hsa-miR-199a-3p	0	0	204.613	111.88	342.989	0	156.623	62.8461	59.5395	24.5791	78.7085	2.42788	27.3557	177.627	0	114.486	113.533	33.0142	97.7173	56.6588	1664.6
hsa-miR-199b-3p	0	0	204.613	111.88	342.989	0	156.623	62.8461	59.5395	24.5791	78.7085	2.42788	27.3557	177.627	0	114.486	113.533	33.0142	97.7173	56.6588	1664.6
hsa-miR-151a-3p	0	110.518	139.069	355.506	6.72527	9.87467	22.1115	0	3.24761	1.69511	0	0	293.511	0	104.968	200.171	0	36.1584	180.958	78.3225	1542.84
hsa-miR-320a	59.354	56.1061	0.569953	220.971	23.5384	219.437	66.3345	0	51.4204	12.4308	0	0	270.982	0	0	152.888	25.9176	99.8286	0	0	1259.78
hsa-miR-99b-5p	105.772	105.437	78.6535	165.206	0	0	151.095	0	142.895	0	0	0	270.982	0	75.1065	0	44.0369	0	0	59.9917	1199.18
hsa-miR-30e-5p	0	0	141.348	274.994	20.1758	0	106.872	0	291.202	0	1.32283	0	180.226	0	0.904898	0	268.35	0	7.23832	0	1292.63
hsa-miR-128-3p	1.5219	0	80.9334	0	0	0	125.299	0	7.57775	0	0	0	350.797	0	0	84.9646	584.865	139.917	0	0	1375.88
hsa-miR-125b-5p	31.9598	0	166.426	71.1011	0	0	58.964	0	33.5586	0	0	0	12.2296	148.023	0.904898	0	465.14	103.759	57.9065	0	1149.97
hsa-miR-181a-5p	63.1587	0	71.8141	189.255	349.714	59.248	40.5378	125.692	0	0.847557	1.32283	0	43.7691	260.52	0	0	66.0554	0	2.41277	0	1274.35
hsa-miR-29a-3p	0	0	128.809	0	26.9011	0	18.4263	0	0	0	0	158.621	87.5383	0	88.68	1.44008	75.6885	1.5721	4.82554	0	592.502
hsa-miR-486-5p	0.760949	60.9757	183.525	37.6418	0	13.1662	55.2788	57.6706	38.9713	89.841	1.32283	0	161.56	0	18.098	230.412	328.901	15.721	53.081	0	1346.93
hsa-miR-199a-5p	151.429	0	0	28.7541	0	0	403.535	0	0	0	2.64566	0	0	112.497	145.689	88.5648	0	64.4563	0	141.647	1139.22
hsa-miR-101-3p	66.2025	85.1119	226.841	126.518	87.4285	0	81.0755	0	37.8888	8.47557	0	0	65.6537	0	0.904898	77.7642	125.23	15.721	0	48.3266	1053.14
hsa-miR-451a	0	0	96.892	108.743	390.065	0	162.151	0	0	46.6156	27.7795	114.919	32.1832	331.571	0	0	0	0	69.9704	0	1380.89
hsa-miR-146b-5p	0	0	86.6329	354.46	67.2527	0	202.689	0	6.49521	0	1.32283	0	0	23.6836	0	1.44008	141.744	0	2.41277	0	888.133
hsa-miR-152-3p	0	0	0	0	975.164	0	0	0	0	0	2.64566	0	0	0	0	0	0	0	0	0	977.809
hsa-miR-221-3p	53.2664	0	0	0	6.72527	0	117.928	0	0	0	0	0	128.733	5.92091	36.1959	0	52.2938	3.14421	0	0	404.207
hsa-miR-23a-3p	0	0	0	49.1434	753.23	92.9865	0	0	0	0	0	1.61858	55.0333	0	0	0	31.6515	1.5721	22.9213	0	1008.16
hsa-miR-532-5p	50.2226	0	18.2385	14.6385	356.439	0	0	0	1.08254	0	0	0	37.9762	0	44.34	0	0	105.331	168.894	0	797.162
hsa-miR-142-5p	0.760949	0	1.13991	140.111	329.538	0	0	0	0	0	0	0	0.643664	0	0.904898	0	0	0	9.65109	0	482.75
hsa-miR-455-5p	0	0	0	64.8275	659.076	0	0	0	1.08254	0	0	0	0	0	0	0	0	0	0	0	724.986
hsa-miR-181b-5p	35.7646	0	95.7521	47.0522	0	0	128.984	0	0	58.4814	0	0	162.847	0	0	0	0	0	98.9237	0	627.805
hsa-miR-140-3p	0	1.27033	353.371	0	26.9011	144.829	0	0	49.7966	0	0	4.85575	68.2284	0	0	0	0	0	0	0	649.252
hsa-miR-16-5p	0	0	0	6.27363	396.791	0	0	0	0	0	0	0	49.5621	0	35.291	89.2848	105.964	1.5721	2.41277	1.66644	688.817
hsa-miR-206	2.28285	0	0	71.1011	0	0	0	0	0	0	0	0	118.434	213.153	64.2478	4.32023	176.148	0	9.65109	1.66644	661.004
hsa-miR-205-5p	0	0	0	0	0	0	0	0	0	0	0	0	92.0439	0	0	0	0	0	0	0	92.0439
hsa-miR-186-5p	0	0	201.763	130.701	0	0	0	0	0	0	1.32283	0	93.9749	0	0	0	0	1.5721	0	0	429.334
hsa-miR-142-3p	0	1.27033	0	69.0099	33.6263	0	0	0	0	0	0	0	0	0	0	0	1.37615	0	0	0	105.283
hsa-miR-20a-5p	0	0	0	12.5473	0	0	202.689	0	2.16507	0	0	0	54.7114	0	0	90.7249	0	0	0	0	362.837
hsa-miR-4433b-3p	0	0	0	0	0	449.298	0	0	0	77.1277	0	0	0	0	0	0	0	0	0	0	526.425
hsa-miR-218-5p	62.3978	0	0	152.658	0	0	7.3705	0	10.8254	0	0	0	43.7691	0	54.2939	24.4813	122.478	92.7542	125.464	0	696.492
hsa-miR-30e-3p	0	0	0	34.505	33.6263	0	0	0	0	0	0	0	90.1129	0	0.904898	0	377.066	0	50.6682	53.326	640.209
hsa-miR-30a-3p	0	0	0	0	0	0	3.68525	0	40.0538	0	0	0	68.2284	0	0.904898	0	375.69	1.5721	12.0639	0	502.198
hsa-miR-133a-3p	0	0	0	0	0	0	0	0	0	0	0	0	17.3789	0	0	1.44008	228.442	0	136.322	0	383.582
hsa-miR-425-5p	0	0	0	1.04561	0	0	361.155	0	0	0	0	0	42.4818	0	0	0	183.028	0	0	0	587.71
hsa-miR-423-3p	38.8084	1.27033	1.13991	39.733	33.6263	0	0	0	0	0	0	0	101.055	0	0	84.9646	39.9085	99.0426	31.366	0	470.915
hsa-miR-499a-5p	0	0	0	0	0	0	3.68525	0	0	0	0	0	32.1832	0	2.71469	0	465.14	0	94.0981	0	597.821
hsa-miR-200c-3p	0	0	0	65.8731	0	0	0	0	0	0	0	0	46.9875	0	0	0	0	132.057	0	0	244.917
hsa-miR-629-5p	0	53.3537	0	85.7396	0	0	0	0	1.08254	0	0	0	131.307	0	0	0	0	0	0	0	271.483
hsa-miR-23b-3p	0	0	0	7.31924	0	173.63	0	0	0	0	0	0	2.25282	0	0	0	61.9269	3.14421	109.781	0	358.054
hsa-miR-1183	0	0	66.1146	0	0	0	0	88.7239	0	66.957	0	0	0	290.125	0	0	0	0	0	19.9972	531.917
hsa-miR-103a-3p	0	0	104.301	94.1045	6.72527	0	0	0	3.24761	0	0	0	86.251	0	18.098	0	69.4958	45.591	2.41277	0	430.227
hsa-miR-370-3p	0	0	0	0	0	0	0	0	59.5395	0	0	0	0	0	0	0	0	0	2.41277	0	61.9522
hsa-miR-185-5p	0	62.246	0	0	6.72527	0	114.243	0	0	1.69511	0	0	0	0	16.2882	0	125.23	53.4516	0	0	379.879
hsa-miR-98-5p	0.760949	0	3.41972	2.09121	3.36263	0	95.8165	0	0	0	0	0	110.71	0	0	0	162.386	1.5721	53.081	0	433.2
hsa-miR-340-5p	0	0	0	33.4594	161.406	0	0	0	0	0	0	0	0.643664	0	0	0	1.37615	1.5721	0	0	198.458
hsa-miR-31-5p	0	0	0	0	0	0	103.187	0	0	0	0	0	54.7114	0	0	0	0	0	0	0	157.898
hsa-miR-93-5p	0	0	0	0	0	0	0	0	241.405	0	0	0	42.4818	0	0	0	0	0	0	0	283.887
hsa-miR-196a-5p	0	0	0	112.925	0	0	0	0	107.171	0	0	0	134.526	0	0	0	56.4223	0	2.41277	0	413.457
hsa-miR-149-5p	0	0	0	0	0	0	3.68525	0	0	0	0	0	14.8043	0	0	0	360.552	0	0	0	379.042
hsa-let-7e-5p	0	0	13.1089	76.3292	0	0	51.5935	0	1.08254	0	0	0	66.6192	0	0	0	50.9177	0	84.447	0	344.098
hsa-miR-28-3p	65.4416	0	123.11	175.662	0	0	0	0	0	0	0	0	0	0	0	0	0	40.8747	0	0	405.088
hsa-miR-1307-3p	63.1587	0	0	0	0	0	0	0	1.08254	0	0	0	81.1016	0	0	18.721	0	0	0	0	164.064
hsa-miR-182-5p	56.3102	0	0	46.0066	0	0	0	0	123.409	0	0	0	180.87	0	0	0	0	0	2.41277	0	409.008
hsa-miR-320b	0	56.1061	0.569953	99.681	10.0879	68.0255	0	0	2.70634	12.4308	0	0	19.9536	0	0	31.9217	20.4129	10.2187	0	0	332.115
hsa-miR-363-3p	0	0	0	39.733	0	0	0	0	2.16507	0	0	0	0	0	0	0	0	0	0	0	41.8981
hsa-miR-194-5p	0	0	0	72.1468	0	0	29.482	0	0	0	0	0	26.3902	0	0	28.8016	1.37615	14.1489	50.6682	0	223.014
hsa-miR-374b-5p	0	0	0	28.2313	6.72527	0	0	0	1.08254	0	0	0	147.721	0	0	123.847	0	0	0	0	307.607
hsa-miR-455-3p	41.8522	0	0	0	0	0	0	0	0	0	0	0	0	0	0	0	0	0	0	0	41.8522
hsa-miR-660-5p	0	0	0	128.609	0	0	0	0	0	0	0	0	0	0	0	0	0	0	0	0	128.609
hsa-miR-150-3p	0	0	0	0	0	0	0	0	0	0	0	0	0	325.65	0	0	0	0	0	0	325.65
hsa-miR-200a-3p	0	0	0	104.561	0	0	0	0	0	0	0	0	1.28733	0	0	0	0	0	4.82554	0	110.673
hsa-miR-210-3p	0	0	0	0	6.72527	0	81.0755	0	0	0	0	0	91.4003	0	0	0	118.349	0	31.366	0	328.916
hsa-miR-139-5p	0	0	0	0	0	0	18.4263	0	0	0	0	0	0	0	0	0	140.368	0	0	0	158.794
hsa-miR-361-3p	0	0	208.603	0	6.72527	0	0	0	0	0	0	50.1761	0	0	0.904898	0	23.3946	6.28842	0	0	296.092
hsa-miR-196b-5p	0	0	0	156.841	0	0	58.964	0	4.33014	0	0	0	0	0	0	86.4047	0	0	4.82554	0	311.365
hsa-miR-199b-5p	0	0	0	90.4448	0	0	204.531	0	0	0	0	0	0	0	0	0.720039	0	15.721	0	0	311.417
hsa-let-7d-3p	0	0	0	0	0	0	3.68525	0	0	0	0	0	0	0	0	0	178.9	0	0	0	182.585
hsa-miR-27a-5p	0	0	0	0	0	0	44.223	0	0	0	0	0	43.1255	0	0	0	44.0369	0	0	0	131.385
hsa-miR-20a-3p	0	0	0	0	0	0	0	0	0	0	0	0	0	0	0	0	0	0	0	0	0
hsa-miR-7107-3p	0	2.54065	0	0	0	0	0	31.0534	0	63.5668	13.2283	51.7947	0	59.2091	0	0	0	0	0	0	221.393
hsa-miR-30b-5p	0	0	45.5963	51.2347	0	0	0	0	0	0	0	0	0	0	0	0	0	0	0	0	96.8309
hsa-miR-200b-3p	0	0	0	0	0	0	0	0	0	0	0	0	39.9072	0	29.8616	0	0	81.7494	55.4938	0	207.012
hsa-miR-543	40.3303	0	0	0	0	0	0	0	0	0	0	0	40.5508	0	0	0	0	59.74	0	0	140.621
hsa-miR-130b-5p	0	0	0	40.7786	0	0	0	0	0	0	0	0	37.9762	0	0	0	0	0	0	0	78.7548
hsa-miR-4755-3p	0	0	1.13991	0	0	0	246.912	0	0	0	0	0	0	0	0	0	0	0	0	0	248.052
hsa-miR-708-5p	0	0	0	0	0	0	0	0	0	0	0	0	0	0	0	0	0	0	0	0	0
hsa-miR-126-5p	0	0	0	0	0	0	0	0	0	0	0	0	46.9875	0	0	0	161.01	0	0	0	207.997
hsa-miR-17-5p	43.7546	0	0	0	0	0	0	0	0	0	0	0	43.7691	0	0	0	0	0	0	0	87.5237
hsa-miR-574-5p	0	0	0	0	0	0	0	0	0	0	0	0	0	236.836	0	0	0	0	0	0	236.836
hsa-miR-424-3p	0	0	0	93.0589	0	0	0	0	0	0	0	0	16.7353	0	132.115	0	0	0	0	0	241.909
hsa-miR-744-5p	0	0	0	30.3225	0	0	0	0	0	25.4267	0	0	0	0	0	0	0	0	0	54.9924	110.742
hsa-miR-148b-3p	0	0	0	0	0	0	0	0	0	0	0	0	133.882	0	0	48.9626	1.37615	3.14421	2.41277	0	189.778
hsa-miR-140-5p	0	0	0	0	0	0	0	0	1.08254	0	1.32283	0	0	0	0	0	0	1.5721	0	0	3.97747
hsa-miR-379-5p	0	0	0	0	0	0	0	0	0	0	0	0	17.3789	0	0	0	0	0	55.4938	0	72.8727
hsa-miR-28-5p	0	0	80.9334	0	6.72527	0	0	0	0	0	0	0	21.8846	0	0	51.8428	1.37615	0	0	0	162.762
hsa-miR-1248	0	52.0834	0	0	6.72527	16.4578	0	0	0	34.7498	68.7873	3.23717	0	0	0	0	0	0	0	0	182.041
hsa-miR-214-3p	0	0	0	0	0	177.744	0	0	0	0	0	0	0	0	0	0	0	0	0	0	177.744
hsa-miR-92b-3p	0	0	0	4.18242	0	73.2372	40.5378	0	0	0	0	0	0.643664	35.5255	0	0	0	0	0	8.33218	162.459
hsa-miR-144-3p	0	0	0	0	0	0	0	0	0	0	0	0	0	0	0	0	0	0	166.481	0	166.481
hsa-miR-99b-3p	0	0	169.846	0	0	0	0	0	0	0	0	0	0	0	0	0	0	0	0	0	169.846
hsa-miR-381-3p	0	0	0	49.1434	0	0	0	0	0	0	0	0	1.93099	0	0	0	0	110.047	0	0	161.122
hsa-miR-106b-3p	0	0	53.5756	72.1468	0	0	0	0	3.24761	0	0	0	0	0	0	0	0	0	0	0	128.97
hsa-miR-378c	0	0	0	0	0	0	0	0	0	0	0	0	47.6311	0	1.8098	0	81.8811	9.43263	0	0	140.755
hsa-miR-493-5p	0	0	0	0	0	0	0	0	0	0	0	1.61858	0	0	0	0	134.863	0	0	0	136.482
hsa-miR-7974	0	0	0	0	0	0	0	0	1.08254	0	0	0	36.0452	0	0	0	97.7069	0	0	0	134.835
hsa-miR-224-5p	0	0	0	50.189	0	0	0	0	0	0	0	0	0	0	0	0	0	0	77.2087	0	127.398
hsa-miR-484	0	0	0	108.743	0	0	0	0	1.08254	0	0	0	0	0	0	0	0	0	0	0	109.825
hsa-miR-320c	0	11.0095	0	31.7167	6.72527	26.8811	0	0	0	2.26015	0	0	4.50565	0	0	8.16044	5.96333	6.28842	0	0	103.51
hsa-miR-548o-3p	0	0	0	0	0	0	0	0	0.541268	0	0	0	0	0	0	0	0	0	0	0	0.541268
hsa-miR-548av-3p	0	0	0	0	0	0	0	0	0.541268	0	0	0	0	0	0	0	0	0	0	0	0.541268
hsa-miR-501-3p	0	0	0	0	0	0	0	0	0	0	0	0	0	0	0	0	68.8077	45.591	0	0	114.399
hsa-miR-941	0	0	0	119.199	0	0	0	0	0	0	0	0	0	0	0	0	0	0	0	0	119.199
hsa-miR-19b-3p	0	0	91.1925	0	0	0	0	0	1.08254	0	0	0	0	0	0	1.44008	0	0	0	0	93.7151
hsa-miR-1228-5p	0	0	0	0	0	0	0	0	0	0	3.9685	0	0	0	0	0	0	0	0	0	3.9685
hsa-miR-145-3p	0	0	0	0	0	0	0	0	0	0	0	0	1.28733	0	0	0	61.9269	0	0	0	63.2142
hsa-miR-3615	0	0	0	72.1468	0	0	0	0	0	0	0	0	0	0	38.0057	0	0	0	0	0	110.152
hsa-miR-4671-5p	2.28285	1.27033	3.41972	0	0	0	0	1.47873	0	20.3414	0	1.61858	0	0	0	0	0	0	77.2087	0	107.62
hsa-miR-378g	0	0	0	0.522803	0	0	0	0	0	0	0	0.809292	35.0797	0	0	0	52.2938	0	0	0	88.7056
hsa-mir-378c	0	0	0	1.04561	0	0	0	0	0	0	0	0	0.429109	0	0.301633	0	96.3308	0	0	0	98.1071
hsa-miR-1180-3p	0	0	0	100.378	0	0	0	0	1.08254	0	0	0	0	0	0	0	0	0	0	0	101.461
hsa-miR-296-3p	0	0	0	0	0	0	95.8165	0	0	0	0	0	0	0	0	0	0	0	0	0	95.8165
hsa-miR-345-5p	0	0	0	0	0	0	0	0	0	0	0	0	0	0	0	0	94.9546	0	0	0	94.9546
hsa-miR-505-5p	0	0	0	0	0	0	0	0	0	0	0	0	0	0	0	0	0	0	91.6853	0	91.6853
hsa-miR-127-3p	0	0	0	4.18242	6.72527	0	0	0	0	0	0	1.61858	10.9423	0	0	0	0	15.721	0	0	39.1896
hsa-miR-25-5p	0	0	0	0	0	0	0	0	0	0	0	0	87.5383	0	0	0	0	0	0	0	87.5383
hsa-miR-483-5p	0	0	0	80.5116	0	0	0	0	0	0	0	0	0	0	0	0	0	0	0	0	80.5116
hsa-miR-490-3p	0	0	0	0	0	0	0	0	0	0	0	0	78.527	0	0	0	0	0	0	0	78.527
hsa-miR-652-3p	0	0	0	0	0	0	0	0	0	0	0	0	0	0	0	0	0	0	0	0	0
hsa-miR-221-5p	0	0	0	0	0	0	0	0	0	0	0	0	0	0	0	0	0	77.0331	0	0	77.0331
hsa-miR-32-3p	0	0	0	0	0	0	0	0	0	0	0	0	0	0	0	0	0	0	72.3832	0	72.3832
hsa-miR-486-3p	0	0	1.13991	0	0	0	0	0	0	0	0	0	14.8043	0	0	0	56.4223	0	0	0	72.3665
hsa-miR-32-5p	29.677	0	0	0	0	0	0	0	0	0	0	0	14.1606	0	0	0	1.37615	0	0	0	45.2138
hsa-miR-223-5p	0	0	0	0	0	0	0	0	0	0	0	0	0	0	0	0	0	0	0	0	0
hsa-miR-495-3p	0	0	69.5343	0	0	0	0	0	0	0	0	0	0	0	0	0	0	0	0	0	69.5343
hsa-miR-208a-3p	0	0	0	67.9643	0	0	0	0	0	0	0	0	0	0	0	0	0	0	0	0	67.9643
hsa-miR-409-3p	0	0	0	0	0	0	66.3345	0	0	0	0	0	0	0	0	0	0	0	0	0	66.3345
hsa-miR-378d	0	0	0	17.7753	0	0	0	0	0	0	0	0	0.429109	0	0.754082	0	35.78	3.14421	0	0	57.8827
hsa-miR-16-2-3p	0	0	0	0	0	0	0	0	61.7045	0	0	0	0	0	0	0	0	0	0	0	61.7045
hsa-miR-493-3p	0	0	0	0	0	0	0	0	0	0	0	0	60.5044	0	0	0	0	0	0	0	60.5044
hsa-miR-200a-5p	0	0	0	57.5083	0	0	0	0	0	0	0	0	0	0	0	0	0	0	2.41277	0	59.9211
hsa-miR-29b-3p	0	0	0	0	0	0	0	0	0	0	0	0	0	0	0	0	52.2938	0	0	0	52.2938
hsa-miR-19a-3p	0	0	1.13991	0	0	0	0	0	0	0	0	0	0	0	0	0	0	45.591	0	0	46.7309
hsa-miR-24-2-5p	0	0	0	0	0	0	0	0	0	0	0	0	0	0	0	0	0	23.5816	2.41277	0	25.9943
hsa-miR-193a-5p	0	0	0	0	0	0	0	0	54.1268	0	0	0	0	0	0	0	0	0	0	0	54.1268
hsa-miR-7-1-3p	0	0	0	51.2347	0	0	0	0	0	0	0	0	0	0	0	0	0	0	0	0	51.2347
hsa-miR-589-5p	0	0	0	0	0	0	0	0	0	0	0	0	52.7804	0	0	0	0	0	0	0	52.7804
hsa-miR-328-3p	0	0	0	0	0	44.436	0	0	0	0	0	0	0	0	0	1.44008	0	0	0	0	45.8761
hsa-miR-9-5p	0	0	0	0	6.72527	0	0	0	1.08254	0	0	0	1.28733	0	0	37.442	0	0	2.41277	0	48.9499
hsa-miR-92a-1-5p	0	0	0	0	0	0	47.9083	0	1.08254	0	0	0	0	0	0	0	0	0	0	0	48.9908
hsa-miR-1254	0	0	0	0	0	0	47.9083	0	0	0	0	0	0	0	0	0	0	0	0	0	47.9083
hsa-miR-195-5p	0	0	0	0	0	0	3.68525	0	0	0	0	0	0	0	0	0	0	0	0	0	3.68525
hsa-miR-223-3p	0	0	0	34.505	0	0	0	0	0	0	0	0	0	0	0	0	0	0	0	0	34.505
hsa-miR-107	0	0	0.569953	0	0	0	0	0	0	0	0	0	0	0	18.098	0	15.8258	0	0	0	34.4937
hsa-miR-504-5p	0	0	0	0	0	0	0	0	9.74282	0	0	0	0	0	0	0	0	0	33.7788	0	43.5216
hsa-miR-136-3p	0	0	0	0	0	0	0	0	0	0	0	0	42.4818	0	0	0	0	0	0	0	42.4818
hsa-miR-654-3p	0	0	0	0	0	0	0	0	0	0	0	0	0	0	0	0	0	42.4468	0	0	42.4468
hsa-miR-1303	0	0	42.1765	0	0	0	0	0	0	0	0	0	0	0	0	0	0	0	0	0	42.1765
hsa-miR-615-3p	40.3303	0	0	0	0	0	0	0	1.08254	0	0	0	0	0	0	0	0	0	0	0	41.4128
hsa-miR-485-3p	0	0	0	0	0	0	0	0	0	0	0	38.846	0	0	0	0	0	0	0	0	38.846
hsa-miR-340-3p	0	0	0	0	0	0	0	0	1.08254	0	0	0	0	0	0	0	0	0	0	0	1.08254
hsa-let-7a-3p	0	0	0	0	0	0	0	0	0	0	0	0	14.1606	0	0.904898	0	0	0	0	0	15.0655
hsa-miR-96-5p	0	0	0	0	0	0	0	0	0	0	0	0	34.7578	0	0	0	0	0	0	0	34.7578
hsa-miR-342-3p	0	0	0	0	6.72527	0	0	0	0	0	0	0	0	0	0	0	0	0	0	0	6.72527
hsa-miR-582-3p	0	0	0	35.5506	0	0	0	0	0	0	0	0	0	0	0	0	0	0	0	0	35.5506
hsa-miR-758-3p	0	0	0	0	0	0	33.1673	0	0	0	0	0	0	0	0	0	0	0	0	0	33.1673
hsa-miR-92b-5p	0	0	0	0	0	0	0	0	0	0	0	0	32.8269	0	0	0	0	0	0	0	32.8269
hsa-miR-625-3p	0.760949	0	0	0	0	0	0	0	1.08254	0	0	0	0	0	0	0	0	29.87	0	0	31.7135
hsa-miR-3065-5p	0	0	0	28.2313	0	0	0	0	0	0	0	0	0	0	0	0	0	0	0	0	28.2313
hsa-miR-181c-5p	21.3066	0	0	0	0	0	0	0	0	0	0	0	0	0	0	0	0	0	0	0	21.3066
hsa-miR-106b-5p	1.5219	0	0	0	0	0	0	0	0	0	0	0	14.8043	0	0	0	0	0	0	0	16.3262
hsa-miR-942-5p	0	0	0	0	0	0	0	0	0	0	0	0	0	0	0	0	0	0	24.1277	0	24.1277
hsa-miR-1290	0	0	0	1.04561	0	0	0	0	0	0	0	0	0.643664	0	0	1.44008	0	0	0	0	3.12935
hsa-miR-212-5p	0	0	0	0	0	0	0	0	0	0	0	0	0	0	0	0	22.0185	0	0	0	22.0185
hsa-miR-7706	0	0	0	0	0	0	0	0	0	0	0	0	21.8846	0	0	0	0	0	0	0	21.8846
hsa-miR-378f	0	0	0	0	0	0	0	0	1.08254	0	0	0	0	5.92091	0.904898	0	5.50461	0	0	0	13.413
hsa-miR-802	0	0	0	0	0	0	0	0	0	0	0	0	16.7353	0	0	0	0	1.5721	0	0	18.3074
hsa-miR-378e	0.760949	0	0	1.04561	0	0	0	0	0	0	0	0	0	11.8418	0.904898	0	0	1.5721	0	0	16.1254
hsa-miR-30c-2-3p	0	0	0	0	0	0	0	0	0	0	0	0	0	0	0	0	13.7615	0	0	0	13.7615
hsa-miR-145-5p	0	0	0	0	0	0	0	0	0	0	0	0	0	0	0	0	0	0	0	0	0
hsa-miR-181d-5p	0	0	0	0	0	0	0	0	0	0	0	0	0	0	0	0	1.37615	0	0	0	1.37615
hsa-miR-450a-5p	0	0	0	0	0	0	0	0	0	0	0	0	0	0	0	0	0	0	0	0	0
hsa-miR-548am-3p	0	0	0	0	0	0	0	0	0	0	0	0	0	0	0	0	0	0	0	0	0
hsa-miR-342-5p	0	0	0	0	0	0	0	0	0	0	0	0	0	0	0	0	0	0	0	0	0
hsa-miR-187-3p	0	0	0	0	0	0	0	0	0	0	0	0	0	0	0	0	0	0	2.41277	0	2.41277
hsa-miR-339-5p	0	0	0	0	0	0	0	0	0	0	0	0	0	0	0.904898	0	0	0	0	0	0.904898
hsa-miR-23c	0	0	0	0	0	0	0	0	0	0	0	0	0	0	0	0	0	0	12.0639	0	12.0639
hsa-miR-215-5p	0.380474	0	0	0.522803	0	0	0	0	0	0	0	0	5.14931	0	0	0	0	0.786052	0	0	6.83864
hsa-miR-15b-3p	0	0	0	0	0	0	0	0	0	0	0	0	0	0	0	0	0	0	0	0	0
hsa-miR-4466	0	0	0	0	0	0	0	0	0	0	0	0	0	0	0	0	0	0	0	0	0
hsa-miR-143-5p	0	0	0	0	0	0	0	0	0	0	0	0	0	0	0	0	0	0	0	0	0
hsa-miR-22-5p	0	0	0	0	0	0	0	0	0	0	0	0	0	0	0	0	0	0	0	0	0
hsa-miR-584-5p	0	0	0	0	0	9.87467	0	0	0	0	0	0	0	0	0	0	0	0	0	0	9.87467
hsa-miR-195-3p	0	0	0	0	0	0	0	0	0	0	0	0	0	0	0	0	0	0	0	0	0
hsa-miR-15b-5p	0	0	0	0	0	0	0	0	0	0	0	0	0	0	0	0	0	0	0	0	0
hsa-miR-10a-3p	0	0	0	0	0	0	3.68525	0	1.08254	0	0	0	0	0	0	0	0	0	0	0	4.76779
hsa-miR-641	0	0	0	0	6.72527	0	0	0	0	0	0	0	1.28733	0	0	0	0	0	0	0	8.01259
hsa-miR-29c-5p	0	0	0	0	6.72527	0	0	0	0	0	0	0	0	0	0	0	0	0	0	0	6.72527
hsa-miR-211-5p	0	0	0	0	0	0	0	0	0	0	0	0	0	0	0	0	0	0	0	0	0
hsa-miR-183-5p	0	0	0	1.04561	0	0	0	0	0	0	0	0	0	0	0	0	0	0	0	0	1.04561
hsa-miR-378a-5p	0	0	0	0	0	0	0	0	0	0	0	0	0	0	0.904898	0	0	0	0	0	0.904898
hsa-miR-197-3p	0	0	0	0	6.72527	0	0	0	0	0	0	0	0	0	0	0	0	0	0	0	6.72527
hsa-miR-148b-5p	0	0	0	0	6.72527	0	0	0	0	0	0	0	0	0	0	0	0	0	0	0	6.72527
hsa-miR-1291	0	0	0	0	6.72527	0	0	0	0	0	0	0	0	0	0	0	0	0	0	0	6.72527
hsa-miR-132-3p	0	0	0	0	0	0	0	0	0	0	0	0	0	0	0	0	0	1.5721	0	0	1.5721
hsa-miR-130a-3p	0	0	0	0	0	0	0	0	0	0	0	0	0	0	0	0	1.37615	0	0	0	1.37615
hsa-miR-204-5p	0	0	0	0	0	0	0	0	0	0	0	0	0	0	0	0	0	0	0	0	0
hsa-miR-421	0	0	0	0	0	0	0	0	0	0	0	0	0	0	0	0	0	0	0	0	0
hsa-miR-144-5p	0	0	0	0	0	0	0	0	0	0	0	0	0	0	0	0	0	0	0	0	0
hsa-miR-335-3p	0	0	0	0	0	0	0	0	0	0	0	0	0	0	0	0	0	0	0	0	0
hsa-miR-361-5p	0	0	0	0	0	0	0	0	0	0	0	0	0	0	0	0	0	0	0	0	0
hsa-miR-133b	0	0	0	0	0	0	0	0	0	0	0	0	0	0	0	0	0	0	6.03193	0	6.03193
hsa-miR-4429	0	0	0	4.18242	0	1.64578	0	0	0	0	0	0	0	0	0	0	0	0	0	0	5.8282
hsa-miR-20b-5p	0	0	0	0	0	0	0	0	0	0	0	0	0	0	0	0	0	0	0	0	0
hsa-miR-130b-3p	0	0	0	0	0	0	0	0	4.33014	0	0	0	0	0	0	0	0	0	0	0	4.33014
hsa-miR-320d	1.5219	0	0	0	0	0	0	0	0	0	1.32283	0	0	0	0	1.44008	0	0	0	0	4.28481
hsa-miR-1257	0	0	0	0	0	0	0	0	0	0	0	0	0	0	0	0	0	0	0	0	0
hsa-miR-378h	0	0	0	0	0	0	0	0	0	0	0	0	0	0	0	0	0	0	0	0	0
hsa-mir-27b	0	0	0	0	0	0	0	0	0	0	0	0	5.14931	0	0	0	0	0	0	0	5.14931
hsa-miR-411-5p	0	0	0	0	0	0	0	0	0	0	0	0	2.57466	0	0	0	0	0	0	0	2.57466
hsa-miR-425-3p	0	0	0	0	0	0	0	0	0	0	0	0	0	0	0	0	0	0	0	0	0
hsa-miR-129-5p	0	0	0	0	0	0	0	0	0	0	0	0	0	0	0	0	0	0	0	0	0
hsa-miR-106a-5p	0.380474	0	0	0	0	0	0	0	0	0	0	0	1.28733	0	0	0	0	0	0	0	1.6678
hsa-miR-374b-3p	0	0	0	0	0	0	0	0	0	0	0	0	0	0	0	0	0	3.14421	0	0	3.14421
hsa-miR-7641	0	0	0	0	0	0	0	0	0	4.23778	0	0	0	0	0	0	0	0	0	0	4.23778
hsa-miR-590-3p	0	0	0	0	0	0	0	0	1.08254	0	0	0	0	0	0	0	0	3.14421	0	0	4.22674
hsa-miR-4513	0	0	0	0	0	0	0	2.95746	0	0	0	0	0	0	0.904898	0	0	0	0	0	3.86236
hsa-miR-125a-3p	0	0	0	0	0	0	0	0	0	0	0	0	0	0	0	0	0	0	0	0	0
hsa-miR-214-5p	0	0	0	0	0	0	0	0	0	0	0	0	0	0	0	0	0	0	0	0	0
hsa-miR-125b-1-3p	0	0	0	0	0	0	0	0	0	0	0	0	0	0	0	0	0	0	0	0	0
hsa-miR-30c-1-3p	0	0	0	0	0	0	0	0	0	0	0	0	0	0	0	0	0	0	0	0	0
hsa-miR-5689	0	0	0	0	0	0	0	0	0	0	0	0	0	0	0	0	0	0	0	0	0
hsa-miR-330-5p	0	0	0	0	0	0	0	0	0	0	0	0	0	0	0	0	0	0	0	0	0
hsa-miR-181a-3p	0	0	0	0	0	0	0	0	0	0	0	0	0	0	0	0	0	0	0	0	0
hsa-let-7f-1-3p	0	0	0	0	0	0	0	0	0	0	0	0	0	0	0	0	0	0	0	0	0
hsa-miR-15a-5p	0	0	0	0	0	0	0	0	0	0	0	0	0	0	0	0	0	0	0	0	0
hsa-miR-184	0	0	0	0	0	0	0	0	0	0	0	0	0	0	0	0	0	0	0	0	0
hsa-miR-151a-5p	0	0	0	0	0	0	0	0	0	0	0	0	0	0	0	0	0	0	0	0	0
hsa-let-7i-3p	0	0	0	0	0	0	0	0	0	0	0	0	0	0	0	0	0	0	0	0	0
hsa-miR-151b	0	0	0	0	0	0	0	0	0	0	0	0	0	0	0	0	0	0	0	0	0
hsa-let-7b-3p	0	0	0	0	0	0	0	0	0	0	0	0	0	0	0	0	0	0	0	0	0
hsa-miR-424-5p	0	0	0	0	0	0	0	0	0	0	0	0	0	0	0	0	0	0	0	0	0
hsa-miR-26a-2-3p	0	0	0	0	0	0	0	0	0	0	0	0	0	0	0	0	0	0	0	0	0
hsa-let-7f-2-3p	0	0	0	0	0	0	0	0	0	0	0	0	0	0	0	0	0	0	0	0	0
hsa-miR-18a-3p	0	0	0	0	0	0	0	0	0	0	0	0	0	0	0	0	0	0	0	0	0
hsa-miR-4510	0	0	0	1.04561	0	0	0	0	0	0	0	0	0	0	0	0	1.37615	0	0	0	2.42176
hsa-miR-671-3p	0	0	0	0	0	0	0	0	1.08254	0	0	0	0	0	0	0	0	0	0	0	1.08254
hsa-miR-3168	0	0	0	0	0	0	0	0	0	0	0	0	0	0	0	0	0	0	0	0	0
hsa-miR-6777-5p	0	0	0	0	0	0	0	0	0	0	1.32283	0	0	0	0.904898	0	0	0	0	0	2.22773
hsa-mir-27a	0	0	0	0	0	0	0	0	0	0	0	0	1.93099	0	0	0	0	0	0	0	1.93099
hsa-miR-1827	0	0	0	0	0	0	0	0	0	0	0	0	0.643664	0	0	0	0	0	0	0	0.643664
hsa-miR-374a-5p	0	0	0	0	0	0	0	0	1.08254	0	0	0	0.643664	0	0	0	0	0	0	0	1.7262
hsa-miR-548ah-3p	0	0	0	0	0	0	0	0	0	0	0	0	0	0	0	0	0	0	0	0	0
hsa-miR-4422	0	0	0	0	0	0	0	0	0	1.69511	0	0	0	0	0	0	0	0	0	0	1.69511
hsa-miR-1224-5p	0	0	0	0	0	0	0	0	0	0	0	0	1.28733	0	0	0	0	0	0	0	1.28733
hsa-miR-520g-5p	0	1.27033	0	0	0	0	0	0	0	0	0	0	0	0	0	0	0	0	0	0	1.27033
hsa-miR-136-5p	0	0	0	0	0	0	0	0	0	0	0	0	0	0	0	0	0	0	0	0	0
hsa-miR-141-3p	0	0	0	0	0	0	0	0	0	0	0	0	0	0	0	0	0	0	0	0	0
hsa-miR-338-3p	0	0	0	0	0	0	0	0	0	0	0	0	0	0	0	0	0	0	0	0	0
hsa-miR-497-5p	0	0	0	0	0	0	0	0	0	0	0	0	0	0	0	0	0	0	0	0	0
hsa-miR-338-5p	0	0	0	0	0	0	0	0	0	0	0	0	0	0	0	0	0	0	0	0	0
hsa-miR-34a-5p	0	0	0	0	0	0	0	0	0	0	0	0	0	0	0	0	0	0	0	0	0
hsa-miR-187-5p	0	0	0	0	0	0	0	0	0	0	0	0	0	0	0	0	0	0	0	0	0
hsa-miR-3064-5p	0	0	0	0	0	0	0	0	0	0	0	0	0	0	0	0	0	0	0	0	0
hsa-miR-4693-3p	0	0	0	0	0	0	0	0	0	0	0	0	0	0	0	0	0	0	0	0	0
hsa-miR-335-5p	0	0	0	0	0	0	0	0	0	0	0	0	0	0	0	0	0	0	0	0	0
hsa-miR-185-3p	0	0	0	0	0	0	0	0	0	0	0	0	0	0	0	0	0	0	0	0	0
hsa-miR-326	0	0	0	0	0	0	0	0	0	0	0	0	0	0	0	0	0	0	0	0	0
hsa-miR-181c-3p	0	0	0	0	0	0	0	0	0	0	0	0	0	0	0	0	0	0	0	0	0
hsa-miR-744-3p	0	0	0	0	0	0	0	0	0	0	0	0	0	0	0	0	0	0	0	0	0
hsa-miR-26b-3p	0	0	0	0	0	0	0	0	0	0	0	0	0	0	0	0	0	0	0	0	0
hsa-miR-148a-5p	0	0	0	0	0	0	0	0	0	0	0	0	0	0	0	0	0	0	0	0	0
hsa-miR-383-5p	0	0	0	0	0	0	0	0	0	0	0	0	0	0	0	0	0	0	0	0	0
hsa-miR-3074-5p	0	0	0	0	0	0	0	0	0	0	0	0	0	0	0	0	0	0	0	0	0
hsa-miR-139-3p	0	0	0	0	0	0	0	0	0	0	0	0	0	0	0	0	0	0	0	0	0
hsa-miR-532-3p	0	0	0	0	0	0	0	0	0	0	0	0	0	0	0	0	0	0	0	0	0
hsa-miR-152-5p	0	0	0	0	0	0	0	0	0	0	0	0	0	0	0	0	0	0	0	0	0
hsa-miR-574-3p	0	0	0	0	0	0	0	0	0	0	0	0	0	0	0	0	0	0	0	0	0
hsa-miR-511-3p	0	0	0	0	0	0	0	0	0	0	0	0	0	0	0	0	0	0	0	0	0
hsa-miR-30d-3p	0	0	0	0	0	0	0	0	0	0	0	0	0	0	0	0	0	0	0	0	0
hsa-miR-138-5p	0	0	0	0	0	0	0	0	0	0	0	0	0	0	0	0	0	0	0	0	0
hsa-miR-331-3p	0	0	0	0	0	0	0	0	0	0	0	0	0	0	0	0	0	0	0	0	0
hsa-miR-503-5p	0	0	0	0	0	0	0	0	0	0	0	0	0	0	0	0	0	0	0	0	0
hsa-let-7c	0	0	0.569953	0	0	0	0	0	0	0	0.661416	0	0	0	0	0	0	0	0	0	1.23137
hsa-miR-6514-5p	0	0	0	0	0	0	0	0	1.08254	0	0	0	0	0	0	0	0	0	0	0	1.08254
hsa-miR-676-3p	0	0	0	0	0	0	0	0	1.08254	0	0	0	0	0	0	0	0	0	0	0	1.08254
hsa-miR-576-5p	0	0	0	0	0	0	0	0	1.08254	0	0	0	0	0	0	0	0	0	0	0	1.08254
hsa-miR-219a-1-3p	0	0	0	0	0	0	0	0	1.08254	0	0	0	0	0	0	0	0	0	0	0	1.08254
hsa-miR-374a-3p	0	0	0	0	0	0	0	0	1.08254	0	0	0	0	0	0	0	0	0	0	0	1.08254
hsa-miR-1301-3p	0	0	0	1.04561	0	0	0	0	0	0	0	0	0	0	0	0	0	0	0	0	1.04561
hsa-miR-519a-5p	0	0	0	0	0	0	0	0	0	0	0	0	0	0.986818	0	0	0	0	0	0	0.986818
hsa-miR-522-5p	0	0	0	0	0	0	0	0	0	0	0	0	0	0.986818	0	0	0	0	0	0	0.986818
hsa-miR-519c-5p	0	0	0	0	0	0	0	0	0	0	0	0	0	0.986818	0	0	0	0	0	0	0.986818
hsa-miR-518e-5p	0	0	0	0	0	0	0	0	0	0	0	0	0	0.986818	0	0	0	0	0	0	0.986818
hsa-miR-523-5p	0	0	0	0	0	0	0	0	0	0	0	0	0	0.986818	0	0	0	0	0	0	0.986818
hsa-miR-519b-5p	0	0	0	0	0	0	0	0	0	0	0	0	0	0.986818	0	0	0	0	0	0	0.986818
hsa-miR-29c-3p	0	0	0	0	0	0	0	0	0	0	0	0	0.643664	0	0	0	0	0	0	0	0.643664
hsa-miR-365a-3p	0	0	0	0	0	0	0	0	0	0	0	0	0	0	0	0	0	0	0	0	0
hsa-miR-365b-3p	0	0	0	0	0	0	0	0	0	0	0	0	0	0	0	0	0	0	0	0	0
hsa-miR-374c-5p	0	0	0	0	0	0	0	0	0	0	0	0	0.321832	0	0	0	0	0	0	0	0.321832
hsa-miR-4521	0	0	0	0	0	0	0	0	0	0	0	0	0	0	0	0	0	0	0	0	0
hsa-miR-369-3p	0	0	0	0	0	0	0	0	0	0	0	0	0	0	0	0	0	0	0	0	0
hsa-miR-135b-5p	0	0	0	0	0	0	0	0	0	0	0	0	0	0	0	0	0	0	0	0	0
hsa-miR-138-1-3p	0	0	0	0	0	0	0	0	0	0	0	0	0	0	0	0	0	0	0	0	0
hsa-miR-505-3p	0	0	0	0	0	0	0	0	0	0	0	0	0	0	0	0	0	0	0	0	0
hsa-miR-365a-5p	0	0	0	0	0	0	0	0	0	0	0	0	0	0	0	0	0	0	0	0	0
hsa-miR-196a-3p	0	0	0	0	0	0	0	0	0	0	0	0	0	0	0	0	0	0	0	0	0
hsa-miR-200b-5p	0	0	0	0	0	0	0	0	0	0	0	0	0	0	0	0	0	0	0	0	0
hsa-miR-4326	0	0	0	0	0	0	0	0	0	0	0	0	0	0	0	0	0	0	0	0	0
hsa-miR-134-5p	0	0	0	0	0	0	0	0	0	0	0	0	0	0	0	0	0	0	0	0	0
hsa-miR-450b-5p	0	0	0	0	0	0	0	0	0	0	0	0	0	0	0	0	0	0	0	0	0
hsa-miR-21-3p	0	0	0	0	0	0	0	0	0	0	0	0	0	0	0	0	0	0	0	0	0
hsa-miR-18a-5p	0	0	0	0	0	0	0	0	0	0	0	0	0	0	0	0	0	0	0	0	0
hsa-miR-598-3p	0	0	0	0	0	0	0	0	0	0	0	0	0	0	0	0	0	0	0	0	0
hsa-miR-409-5p	0	0	0	0	0	0	0	0	0	0	0	0	0	0	0	0	0	0	0	0	0
hsa-miR-365b-5p	0	0	0	0	0	0	0	0	0	0	0	0	0	0	0	0	0	0	0	0	0
hsa-miR-181a-2-3p	0	0	0	0	0	0	0	0	0	0	0	0	0	0	0	0	0	0	0	0	0
hsa-miR-1250-5p	0	0	0	0	0	0	0	0	0	0	0	0	0	0	0	0	0	0	0	0	0
hsa-miR-3591-5p	0	0	0	0	0	0	0	0	0	0	0	0	0	0	0	0	0	0	0	0	0
hsa-miR-6802-5p	0	0	0	0	0	0	0	0	0	0	0	0	0	0	0	0	0	0	0	0	0
hsa-mir-30e	0	0	0	0	0	0	0	0	0	0	0	0	0	0	0	0	0	0	0	0	0
