# Supplementary material for: Small RNA sequencing of extracellular vesicles identifies circulating miRNAs related to inflammation and oxidative stress in HIV patients
Source: BMC Immunol. 2020 Nov 11;21:57. doi: 10.1186/s12865-020-00386-5 (PMC7656686; doi:10.1186/s12865-020-00386-5)
Supplement: Supplementary file 7 — Additional file 7: Supplementary Table S6 - Enriched pathway terms of networks associated with 61 predicted and validated target genes of 6 miRNAs upregulated in the validation cohort using ClueGo software (.xlsx) [file 12865_2020_386_MOESM7_ESM.xlsx]

## Sheet: ClueGOResults
Supplementary Table 6: Enriched pathway terms of networks associated with 61 target genes of 6 miRNAs upregulated in the validation cohort using ClueGo software
GOID	Ontology Source	GOTerm	Nr. Genes	% Associated Genes	Term PValue	Term PValue Corrected with Benjamini-Hochberg	Associated Genes Found	All Associated Genes
R-HSA:166058	REACTOME_Pathways_13.01.2020	MyD88:MAL(TIRAP) cascade initiated on plasma membrane	4	4.12371	0.00115783	0.0020262	[CREB1, IRAK1, TRAF6, UBE2N]	[884327, 904054, AGER, APP, ATF1, ATF2, BTK, BTRC, CD14, CD36, CHUK, CREB1, CUL1, DUSP3, DUSP4, DUSP6, DUSP7, ECSIT, ELK1, FBXW11, FOS, HMGB1, IKBKB, IKBKG, IRAK1, IRAK2, IRAK3, IRAK4, JUN, LY96, MAP2K1, MAP2K3, MAP2K4, MAP2K6, MAP2K7, MAP3K1, MAP3K7, MAP3K8, MAPK1, MAPK10, MAPK11, MAPK14, MAPK3, MAPK7, MAPK8, MAPK9, MAPKAPK2, MAPKAPK3, MEF2A, MEF2C, MYD88, NFKB1, NFKB2, NFKBIA, NFKBIB, NKIRAS1, …
R-HSA:166166	REACTOME_Pathways_13.01.2020	MyD88-independent TLR4 cascade	4	4.0404	0.00124912	0.00187368	[CREB1, IRAK1, TRAF6, UBE2N]	[AGER, APP, ATF1, ATF2, BIRC2, BIRC3, BTRC, CASP8, CD14, CHUK, CREB1, CUL1, DUSP3, DUSP4, DUSP6, DUSP7, ELK1, FADD, FBXW11, FOS, HMGB1, IKBKB, IKBKE, IKBKG, IRAK1, IRAK2, IRF3, IRF7, JUN, LY96, MAP2K1, MAP2K3, MAP2K4, MAP2K6, MAP2K7, MAP3K7, MAP3K8, MAPK1, MAPK10, MAPK11, MAPK14, MAPK3, MAPK7, MAPK8, MAPK9, MAPKAPK2, MAPKAPK3, MEF2A, MEF2C, NFKB1, NFKB2, NFKBIA, NFKBIB, NKIRAS1, NKIRAS2, NOD1, NO…
R-HSA:168138	REACTOME_Pathways_13.01.2020	Toll Like Receptor 9 (TLR9) Cascade	4	4.12371	0.00115783	0.0020262	[CREB1, IRAK1, TRAF6, UBE2N]	[AGER, APP, ATF1, ATF2, BTRC, CD14, CHUK, CREB1, CUL1, DUSP3, DUSP4, DUSP6, DUSP7, ECSIT, EEA1, ELK1, FBXW11, FOS, HMGB1, IKBKB, IKBKG, IRAK1, IRAK2, IRAK4, IRF7, JUN, LY96, MAP2K1, MAP2K3, MAP2K4, MAP2K6, MAP2K7, MAP3K1, MAP3K7, MAP3K8, MAPK1, MAPK10, MAPK11, MAPK14, MAPK3, MAPK7, MAPK8, MAPK9, MAPKAPK2, MAPKAPK3, MEF2A, MEF2C, MYD88, NFKB1, NFKB2, NFKBIA, NFKBIB, NKIRAS1, NKIRAS2, NOD1, NOD2, P…
R-HSA:168142	REACTOME_Pathways_13.01.2020	Toll Like Receptor 10 (TLR10) Cascade	4	4.65116	0.000737574	0.00193613	[CREB1, IRAK1, TRAF6, UBE2N]	[949101, AGER, APP, ATF1, ATF2, BTRC, CHUK, CREB1, CUL1, DUSP3, DUSP4, DUSP6, DUSP7, ECSIT, ELK1, FBXW11, FOS, HMGB1, IKBKB, IKBKG, IRAK1, IRAK2, IRAK4, JUN, MAP2K1, MAP2K3, MAP2K4, MAP2K6, MAP2K7, MAP3K1, MAP3K7, MAP3K8, MAPK1, MAPK10, MAPK11, MAPK14, MAPK3, MAPK7, MAPK8, MAPK9, MAPKAPK2, MAPKAPK3, MEF2A, MEF2C, MYD88, NFKB1, NFKB2, NFKBIA, NFKBIB, NKIRAS1, NKIRAS2, NOD1, NOD2, PELI1, PELI2, PEL…
R-HSA:168164	REACTOME_Pathways_13.01.2020	Toll Like Receptor 3 (TLR3) Cascade	4	4.25532	0.00102983	0.00196604	[CREB1, IRAK1, TRAF6, UBE2N]	[AGER, APP, ATF1, ATF2, BIRC2, BIRC3, BTRC, CASP8, CHUK, CREB1, CUL1, DUSP3, DUSP4, DUSP6, DUSP7, ELK1, FADD, FBXW11, FOS, HMGB1, IKBKB, IKBKE, IKBKG, IRAK1, IRAK2, IRF3, IRF7, JUN, MAP2K1, MAP2K3, MAP2K4, MAP2K6, MAP2K7, MAP3K7, MAP3K8, MAPK1, MAPK10, MAPK11, MAPK14, MAPK3, MAPK7, MAPK8, MAPK9, MAPKAPK2, MAPKAPK3, MEF2A, MEF2C, NFKB1, NFKB2, NFKBIA, NFKBIB, NKIRAS1, NKIRAS2, NOD1, NOD2, PPP2CA, …
R-HSA:168176	REACTOME_Pathways_13.01.2020	Toll Like Receptor 5 (TLR5) Cascade	4	4.65116	0.000737574	0.00193613	[CREB1, IRAK1, TRAF6, UBE2N]	[949101, AGER, APP, ATF1, ATF2, BTRC, CHUK, CREB1, CUL1, DUSP3, DUSP4, DUSP6, DUSP7, ECSIT, ELK1, FBXW11, FOS, HMGB1, IKBKB, IKBKG, IRAK1, IRAK2, IRAK4, JUN, MAP2K1, MAP2K3, MAP2K4, MAP2K6, MAP2K7, MAP3K1, MAP3K7, MAP3K8, MAPK1, MAPK10, MAPK11, MAPK14, MAPK3, MAPK7, MAPK8, MAPK9, MAPKAPK2, MAPKAPK3, MEF2A, MEF2C, MYD88, NFKB1, NFKB2, NFKBIA, NFKBIB, NKIRAS1, NKIRAS2, NOD1, NOD2, PELI1, PELI2, PEL…
R-HSA:168179	REACTOME_Pathways_13.01.2020	Toll Like Receptor TLR1:TLR2 Cascade	4	4	0.00129661	0.00181525	[CREB1, IRAK1, TRAF6, UBE2N]	[884327, 904054, AGER, APP, ATF1, ATF2, BTK, BTRC, CD14, CD36, CHUK, CREB1, CUL1, DUSP3, DUSP4, DUSP6, DUSP7, ECSIT, ELK1, FBXW11, FOS, HMGB1, IKBKB, IKBKG, IRAK1, IRAK2, IRAK3, IRAK4, JUN, LY96, MAP2K1, MAP2K3, MAP2K4, MAP2K6, MAP2K7, MAP3K1, MAP3K7, MAP3K8, MAPK1, MAPK10, MAPK11, MAPK14, MAPK3, MAPK7, MAPK8, MAPK9, MAPKAPK2, MAPKAPK3, MEF2A, MEF2C, MYD88, NFKB1, NFKB2, NFKBIA, NFKBIB, NKIRAS1, …
R-HSA:168181	REACTOME_Pathways_13.01.2020	Toll Like Receptor 7/8 (TLR7/8) Cascade	4	4.30108	0.000989476	0.0020779	[CREB1, IRAK1, TRAF6, UBE2N]	[AGER, APP, ATF1, ATF2, BTRC, CD14, CHUK, CREB1, CUL1, DUSP3, DUSP4, DUSP6, DUSP7, ECSIT, ELK1, FBXW11, FOS, HMGB1, IKBKB, IKBKG, IRAK1, IRAK2, IRAK4, IRF7, JUN, LY96, MAP2K1, MAP2K3, MAP2K4, MAP2K6, MAP2K7, MAP3K1, MAP3K7, MAP3K8, MAPK1, MAPK10, MAPK11, MAPK14, MAPK3, MAPK7, MAPK8, MAPK9, MAPKAPK2, MAPKAPK3, MEF2A, MEF2C, MYD88, NFKB1, NFKB2, NFKBIA, NFKBIB, NKIRAS1, NKIRAS2, NOD1, NOD2, PELI1, …
R-HSA:168188	REACTOME_Pathways_13.01.2020	Toll Like Receptor TLR6:TLR2 Cascade	4	4.12371	0.00115783	0.0020262	[CREB1, IRAK1, TRAF6, UBE2N]	[884327, 904054, AGER, APP, ATF1, ATF2, BTK, BTRC, CD14, CD36, CHUK, CREB1, CUL1, DUSP3, DUSP4, DUSP6, DUSP7, ECSIT, ELK1, FBXW11, FOS, HMGB1, IKBKB, IKBKG, IRAK1, IRAK2, IRAK3, IRAK4, JUN, LY96, MAP2K1, MAP2K3, MAP2K4, MAP2K6, MAP2K7, MAP3K1, MAP3K7, MAP3K8, MAPK1, MAPK10, MAPK11, MAPK14, MAPK3, MAPK7, MAPK8, MAPK9, MAPKAPK2, MAPKAPK3, MEF2A, MEF2C, MYD88, NFKB1, NFKB2, NFKBIA, NFKBIB, NKIRAS1, …
R-HSA:168638	REACTOME_Pathways_13.01.2020	NOD1/2 Signaling Pathway	3	8.33333	0.000657621	0.00197286	[IRAK1, TRAF6, UBE2N]	[BIRC2, BIRC3, CARD9, CASP1, CASP2, CASP4, CASP8, CASP9, CHUK, CYLD, IKBKB, IKBKG, IRAK1, IRAK2, ITCH, MAP2K6, MAP3K7, MAPK11, MAPK12, MAPK13, MAPK14, NOD1, NOD2, RIPK2, RPS27A, TAB1, TAB2, TAB3, TMEM189-UBE2V1, TNFAIP3, TRAF6, UBA52, UBB, UBC, UBE2N, UBE2V1]
R-HSA:168643	REACTOME_Pathways_13.01.2020	Nucleotide-binding domain, leucine rich repeat containing receptor (NLR) signaling pathways	3	5.17241	0.00263941	0.00307931	[IRAK1, TRAF6, UBE2N]	[1253480, 1254294, 1254395, AIM2, APP, BCL2, BCL2L1, BIRC2, BIRC3, CARD9, CASP1, CASP2, CASP4, CASP8, CASP9, CHUK, CYLD, HSP90AB1, IKBKB, IKBKG, IRAK1, IRAK2, ITCH, MAP2K6, MAP3K7, MAPK11, MAPK12, MAPK13, MAPK14, MEFV, NFKB1, NFKB2, NLRC4, NLRP1, NLRP3, NOD1, NOD2, P2RX7, PANX1, PSTPIP1, PYCARD, RELA, RIPK2, RPS27A, SUGT1, TAB1, TAB2, TAB3, TMEM189-UBE2V1, TNFAIP3, TRAF6, TXN, TXNIP, UBA52, UBB, …
R-HSA:170834	REACTOME_Pathways_13.01.2020	Signaling by TGF-beta Receptor Complex	3	4.10959	0.00505944	0.00505944	[NCOR2, SMAD4, SMAD7]	[ARHGEF18, ATP1B4, BAMBI, CBL, CCNC, CCNK, CCNT1, CCNT2, CDK8, CDK9, CDKN2B, CGN, E2F4, E2F5, F11R, FKBP1A, FURIN, HDAC1, JUNB, MEN1, MTMR4, MYC, NCOR1, NCOR2, NEDD4L, NEDD8, PARD3, PARD6A, PARP1, PMEPA1, PPM1A, PPP1CA, PPP1CB, PPP1CC, PPP1R15A, PRKCZ, RBL1, RHOA, RNF111, RPS27A, SERPINE1, SKI, SKIL, SMAD2, SMAD3, SMAD4, SMAD7, SMURF1, SMURF2, SNW1, SP1, STRAP, STUB1, TFDP1, TFDP2, TGFB1, TGFBR1,…
R-HSA:181438	REACTOME_Pathways_13.01.2020	Toll Like Receptor 2 (TLR2) Cascade	4	4	0.00129661	0.00181525	[CREB1, IRAK1, TRAF6, UBE2N]	[884327, 904054, AGER, APP, ATF1, ATF2, BTK, BTRC, CD14, CD36, CHUK, CREB1, CUL1, DUSP3, DUSP4, DUSP6, DUSP7, ECSIT, ELK1, FBXW11, FOS, HMGB1, IKBKB, IKBKG, IRAK1, IRAK2, IRAK3, IRAK4, JUN, LY96, MAP2K1, MAP2K3, MAP2K4, MAP2K6, MAP2K7, MAP3K1, MAP3K7, MAP3K8, MAPK1, MAPK10, MAPK11, MAPK14, MAPK3, MAPK7, MAPK8, MAPK9, MAPKAPK2, MAPKAPK3, MEF2A, MEF2C, MYD88, NFKB1, NFKB2, NFKBIA, NFKBIB, NKIRAS1, …
R-HSA:1980143	REACTOME_Pathways_13.01.2020	Signaling by NOTCH1	3	4.10959	0.00505944	0.00505944	[JAG1, NCOR2, NUMB]	[ADAM10, ADAM17, APH1A, APH1B, ARRB1, ARRB2, CCNC, CDK8, CNTN1, CREBBP, CUL1, DLK1, DLL1, DLL4, DNER, DTX1, DTX2, DTX4, EP300, FBXW7, HDAC1, HDAC10, HDAC11, HDAC2, HDAC3, HDAC4, HDAC5, HDAC6, HDAC7, HDAC8, HDAC9, HES1, HES5, HEY1, HEY2, HEYL, HIF1A, ITCH, JAG1, JAG2, KAT2A, KAT2B, MAML1, MAML2, MAML3, MAMLD1, MIB1, MIB2, MYC, NCOR1, NCOR2, NCSTN, NEURL1, NEURL1B, NOTCH1, NUMB, PSEN1, PSEN2, PSENE…
R-HSA:2173793	REACTOME_Pathways_13.01.2020	Transcriptional activity of SMAD2/SMAD3:SMAD4 heterotrimer	3	6.81818	0.00118743	0.00191815	[NCOR2, SMAD4, SMAD7]	[ATP1B4, CCNC, CCNK, CCNT1, CCNT2, CDK8, CDK9, CDKN2B, E2F4, E2F5, HDAC1, JUNB, MEN1, MYC, NCOR1, NCOR2, NEDD4L, PARP1, PPM1A, RBL1, RNF111, RPS27A, SERPINE1, SKI, SKIL, SMAD2, SMAD3, SMAD4, SMAD7, SMURF2, SNW1, SP1, TFDP1, TFDP2, TGIF1, TGIF2, TRIM33, UBA52, UBB, UBC, UBE2D1, UBE2D3, USP9X, WWTR1]
R-HSA:383280	REACTOME_Pathways_13.01.2020	Nuclear Receptor transcription pathway	3	5.76923	0.00192888	0.00238273	[NCOR2, NR5A2, RARB]	[AR, ESR1, ESR2, ESRRA, ESRRB, ESRRG, HNF4A, HNF4G, MED1, NCOR1, NCOR2, NR0B1, NR0B2, NR1D1, NR1D2, NR1H2, NR1H3, NR1H4, NR1I2, NR1I3, NR2C1, NR2C2, NR2C2AP, NR2E1, NR2E3, NR2F1, NR2F6, NR3C1, NR3C2, NR4A1, NR4A2, NR4A3, NR5A1, NR5A2, NR6A1, NRBF2, NRBP1, PGR, PPARA, PPARD, PPARG, RARA, RARB, RARG, RORA, RORC, RXRA, RXRB, RXRG, THRA, THRB, VDR]
R-HSA:445989	REACTOME_Pathways_13.01.2020	TAK1 activates NFkB by phosphorylation and activation of IKKs complex	3	9.09091	0.000507621	0.00177667	[IRAK1, TRAF6, UBE2N]	[AGER, APP, CHUK, HMGB1, IKBKB, IKBKG, IRAK1, IRAK2, MAP3K7, NFKB1, NFKB2, NFKBIA, NFKBIB, NKIRAS1, NKIRAS2, NOD1, NOD2, RELA, RIPK2, RPS27A, S100A12, S100B, SAA1, TAB1, TAB2, TAB3, TMEM189-UBE2V1, TRAF6, UBA52, UBB, UBC, UBE2N, UBE2V1]
R-HSA:448424	REACTOME_Pathways_13.01.2020	Interleukin-17 signaling	4	5.55556	0.00037536	0.00157651	[CREB1, IRAK1, TRAF6, UBE2N]	[ATF1, ATF2, BTRC, CHUK, CREB1, CUL1, DUSP3, DUSP4, DUSP6, DUSP7, ELK1, FBXW11, FOS, IKBKB, IKBKG, IL17A, IL17C, IL17F, IL17RA, IL17RB, IL17RC, IL17RE, IL25, IRAK1, IRAK2, JUN, MAP2K1, MAP2K3, MAP2K4, MAP2K6, MAP2K7, MAP3K7, MAP3K8, MAPK1, MAPK10, MAPK11, MAPK14, MAPK3, MAPK7, MAPK8, MAPK9, MAPKAPK2, MAPKAPK3, MEF2A, MEF2C, NFKB1, NOD1, NOD2, PPP2CA, PPP2CB, PPP2R1A, PPP2R1B, PPP2R5D, RIPK2, RPS2…
R-HSA:450294	REACTOME_Pathways_13.01.2020	MAP kinase activation	4	6.25	0.000238441	0.00125181	[CREB1, IRAK1, TRAF6, UBE2N]	[ATF1, ATF2, BTRC, CHUK, CREB1, CUL1, DUSP3, DUSP4, DUSP6, DUSP7, ELK1, FBXW11, FOS, IKBKB, IKBKG, IRAK1, IRAK2, JUN, MAP2K1, MAP2K3, MAP2K4, MAP2K6, MAP2K7, MAP3K7, MAP3K8, MAPK1, MAPK10, MAPK11, MAPK14, MAPK3, MAPK7, MAPK8, MAPK9, MAPKAPK2, MAPKAPK3, MEF2A, MEF2C, NFKB1, NOD1, NOD2, PPP2CA, PPP2CB, PPP2R1A, PPP2R1B, PPP2R5D, RIPK2, RPS27A, RPS6KA1, RPS6KA2, RPS6KA3, RPS6KA5, SKP1, TAB1, TAB2, T…
R-HSA:450302	REACTOME_Pathways_13.01.2020	activated TAK1 mediates p38 MAPK activation	3	12.5	0.000194112	0.00135878	[IRAK1, TRAF6, UBE2N]	[IKBKG, IRAK1, IRAK2, MAP2K3, MAP2K6, MAP3K7, MAPK11, MAPK14, MAPKAPK2, MAPKAPK3, NOD1, NOD2, RIPK2, RPS27A, TAB1, TAB2, TAB3, TMEM189-UBE2V1, TRAF6, UBA52, UBB, UBC, UBE2N, UBE2V1]
R-HSA:450321	REACTOME_Pathways_13.01.2020	JNK (c-Jun kinases) phosphorylation and activation mediated by activated human TAK1	3	13.0435	0.000170422	0.00178943	[IRAK1, TRAF6, UBE2N]	[IKBKG, IRAK1, IRAK2, MAP2K4, MAP2K7, MAP3K7, MAPK10, MAPK8, MAPK9, NOD1, NOD2, RIPK2, RPS27A, TAB1, TAB2, TAB3, TMEM189-UBE2V1, TRAF6, UBA52, UBB, UBC, UBE2N, UBE2V1]
R-HSA:6791312	REACTOME_Pathways_13.01.2020	TP53 Regulates Transcription of Cell Cycle Genes	3	6.25	0.00153001	0.00200814	[BTG2, E2F7, PLK2]	[ARID3A, AURKA, BAX, BTG2, CARM1, CCNA1, CCNA2, CCNB1, CCNE1, CCNE2, CDC25C, CDK1, CDK2, CDKN1A, CDKN1B, CENPJ, CNOT1, CNOT10, CNOT11, CNOT2, CNOT3, CNOT4, CNOT6L, CNOT7, CNOT8, CNOT9, E2F1, E2F4, E2F7, E2F8, EP300, GADD45A, NPM1, PCBP4, PCNA, PLAGL1, PLK2, PLK3, PRMT1, RBL1, RBL2, RGCC, SFN, TFDP1, TFDP2, TNKS1BP1, TP53, ZNF385A]
R-HSA:8986944	REACTOME_Pathways_13.01.2020	Transcriptional Regulation by MECP2	3	4.83871	0.003192	0.00352799	[CREB1, IRAK1, NCOR2]	[AGO1, AGO2, AGO3, AGO4, AURKB, BDNF, CALM1, CALM2, CALM3, CAMK2A, CAMK2B, CAMK2D, CAMK2G, CAMK4, CREB1, CRH, DGCR8, DLL1, FKBP5, FOXG1, GAD1, GAD2, GAMT, GPRIN1, GPS2, GRIA2, GRIN2A, GRIN2B, HDAC1, HDAC2, HDAC3, HIPK2, HTT, IRAK1, LBR, MECP2, MEF2C, MET, MOBP, MOV10, NCOR1, NCOR2, OPRK1, OPRM1, PPARG, PRKACA, PTEN, PTPN1, PTPN4, PVALB, RBFOX1, SGK1, SIN3A, SLC2A3, SOX2, SST, TBL1X, TBL1XR1, TNRC…
R-HSA:937039	REACTOME_Pathways_13.01.2020	IRAK1 recruits IKK complex	3	20	4.49828e-05	0.000944639	[IRAK1, TRAF6, UBE2N]	[CHUK, IKBKB, IKBKG, IRAK1, PELI1, PELI2, PELI3, RPS27A, TMEM189-UBE2V1, TRAF6, UBA52, UBB, UBC, UBE2N, UBE2V1]
R-HSA:937061	REACTOME_Pathways_13.01.2020	TRIF(TICAM1)-mediated TLR4 signaling	4	4.0404	0.00124912	0.00187368	[CREB1, IRAK1, TRAF6, UBE2N]	[AGER, APP, ATF1, ATF2, BIRC2, BIRC3, BTRC, CASP8, CD14, CHUK, CREB1, CUL1, DUSP3, DUSP4, DUSP6, DUSP7, ELK1, FADD, FBXW11, FOS, HMGB1, IKBKB, IKBKE, IKBKG, IRAK1, IRAK2, IRF3, IRF7, JUN, LY96, MAP2K1, MAP2K3, MAP2K4, MAP2K6, MAP2K7, MAP3K7, MAP3K8, MAPK1, MAPK10, MAPK11, MAPK14, MAPK3, MAPK7, MAPK8, MAPK9, MAPKAPK2, MAPKAPK3, MEF2A, MEF2C, NFKB1, NFKB2, NFKBIA, NFKBIB, NKIRAS1, NKIRAS2, NOD1, NO…
R-HSA:9614085	REACTOME_Pathways_13.01.2020	FOXO-mediated transcription	3	4.61538	0.00364969	0.00383218	[BCL6, FOXO1, SMAD4]	[ABCA6, AGRP, AKT1, AKT2, AKT3, ATXN3, BBC3, BCL2L11, BCL6, BTG1, CAT, CAV1, CCNG2, CDKN1A, CDKN1B, CITED2, CREBBP, DDIT3, EP300, FASLG, FBXO32, FOXG1, FOXO1, FOXO3, FOXO4, G6PC, GADD45A, GCK, HDAC1, HDAC2, IGFBP1, INS, KAT2B, KLF4, MSTN, NFYA, NFYB, NFYC, NPY, NR3C1, PCBP4, PCK1, PINK1, PLXNA4, POMC, PPARGC1A, RBL2, RETN, SFN, SIN3A, SIRT1, SIRT3, SMAD2, SMAD3, SMAD4, SOD2, SREBF1, STK11, TRIM63…
R-HSA:975110	REACTOME_Pathways_13.01.2020	TRAF6 mediated IRF7 activation in TLR7/8 or 9 signaling	3	20	4.49828e-05	0.000944639	[IRAK1, TRAF6, UBE2N]	[IRAK1, IRAK4, IRF7, MYD88, RPS27A, TLR7, TLR8, TLR9, TMEM189-UBE2V1, TRAF6, UBA52, UBB, UBC, UBE2N, UBE2V1]
R-HSA:975138	REACTOME_Pathways_13.01.2020	TRAF6 mediated induction of NFkB and MAP kinases upon TLR7/8 or 9 activation	4	4.34783	0.000950249	0.00221725	[CREB1, IRAK1, TRAF6, UBE2N]	[AGER, APP, ATF1, ATF2, BTRC, CD14, CHUK, CREB1, CUL1, DUSP3, DUSP4, DUSP6, DUSP7, ECSIT, ELK1, FBXW11, FOS, HMGB1, IKBKB, IKBKG, IRAK1, IRAK2, IRAK4, JUN, LY96, MAP2K1, MAP2K3, MAP2K4, MAP2K6, MAP2K7, MAP3K1, MAP3K7, MAP3K8, MAPK1, MAPK10, MAPK11, MAPK14, MAPK3, MAPK7, MAPK8, MAPK9, MAPKAPK2, MAPKAPK3, MEF2A, MEF2C, MYD88, NFKB1, NFKB2, NFKBIA, NFKBIB, NKIRAS1, NKIRAS2, NOD1, NOD2, PELI1, PELI2,…
R-HSA:975144	REACTOME_Pathways_13.01.2020	IRAK1 recruits IKK complex upon TLR7/8 or 9 stimulation	3	20	4.49828e-05	0.000944639	[IRAK1, TRAF6, UBE2N]	[CHUK, IKBKB, IKBKG, IRAK1, PELI1, PELI2, PELI3, RPS27A, TMEM189-UBE2V1, TRAF6, UBA52, UBB, UBC, UBE2N, UBE2V1]
R-HSA:975155	REACTOME_Pathways_13.01.2020	MyD88 dependent cascade initiated on endosome	4	4.30108	0.000989476	0.0020779	[CREB1, IRAK1, TRAF6, UBE2N]	[AGER, APP, ATF1, ATF2, BTRC, CD14, CHUK, CREB1, CUL1, DUSP3, DUSP4, DUSP6, DUSP7, ECSIT, ELK1, FBXW11, FOS, HMGB1, IKBKB, IKBKG, IRAK1, IRAK2, IRAK4, IRF7, JUN, LY96, MAP2K1, MAP2K3, MAP2K4, MAP2K6, MAP2K7, MAP3K1, MAP3K7, MAP3K8, MAPK1, MAPK10, MAPK11, MAPK14, MAPK3, MAPK7, MAPK8, MAPK9, MAPKAPK2, MAPKAPK3, MEF2A, MEF2C, MYD88, NFKB1, NFKB2, NFKBIA, NFKBIB, NKIRAS1, NKIRAS2, NOD1, NOD2, PELI1, …
R-HSA:975871	REACTOME_Pathways_13.01.2020	MyD88 cascade initiated on plasma membrane	4	4.65116	0.000737574	0.00193613	[CREB1, IRAK1, TRAF6, UBE2N]	[949101, AGER, APP, ATF1, ATF2, BTRC, CHUK, CREB1, CUL1, DUSP3, DUSP4, DUSP6, DUSP7, ECSIT, ELK1, FBXW11, FOS, HMGB1, IKBKB, IKBKG, IRAK1, IRAK2, IRAK4, JUN, MAP2K1, MAP2K3, MAP2K4, MAP2K6, MAP2K7, MAP3K1, MAP3K7, MAP3K8, MAPK1, MAPK10, MAPK11, MAPK14, MAPK3, MAPK7, MAPK8, MAPK9, MAPKAPK2, MAPKAPK3, MEF2A, MEF2C, MYD88, NFKB1, NFKB2, NFKBIA, NFKBIB, NKIRAS1, NKIRAS2, NOD1, NOD2, PELI1, PELI2, PEL…
